# Supplementary material
Source: bioRxiv or medRxiv preprint supplement (https://medrxiv.org/content/medrxiv/early/2021/12/11/2021.12.10.21267408/DC1/embed/media-1.pdf)
Supplement: Supplementary file [file media-1.pdf]

## **Supplement 1. Methods**

### Data sources

Sources of data on vaccination status, SARS-CoV-2 testing, identification of variants, covariates included in the analyses and data linkage methods have been described previously.<sup>1</sup> Data on all PCR-tests were extracted on 23/11/2021 from week 37 2021 for 12-15-year-olds and week 32 2021 for 16-17-year-olds. For 18-39-year-olds, this was from week 21 2021 if no sequencing or S-Gene Target Failure (SGTF) data available or from week 19 2021 if the sample was sequenced as Delta or as a non-SGTF. For 40-64-year-olds, this was from week 21 2021 if no sequencing or SGTF data or from week 15 2021 for cases if sequenced as Delta or as a non-SGTF. Those vaccinated before the above periods were not included except for age 40-64 where only those vaccinated before week 5 2021 were not included. These restrictions were done to reflect the time that vaccination was a general recommendation in these age groups. Tests performed >10 days after symptom-onset were excluded. Individuals who had previously tested positive (PCR or antibody) prior to the sample date were also excluded from the analysis. A maximum of 4 negative tests could be included per person as long as they were more than 7 days apart and were not after a positive test or within 3 weeks before a positive test. The vast majority only contributed a single negative test.

Testing data and linkage to the Emergency Care Dataset, as well as inclusion and exclusion factors for analysis has been described previously.<sup>2</sup> Emergency care hospitalisation data were extracted on 22/11/2021 with cases and controls included if tested by 4/11/2021 to allow time for hospitalisation in cases which is defined as within 14 days of a positive test.

### Statistical analysis

We have previously reported the methodology for test-negative case-control analysis.<sup>1</sup> Analysis was done by logistic regression with the PCR-test result as the dependent variable and vaccination status included as an independent variable. Vaccine effectiveness was defined as 1- odds of vaccination in cases/odds of vaccination in controls, with vaccination stratified by interval after each dose. Similar

analyses were performed for hospitalisations with all cases included and cases defined as those admitted. Vaccine effectiveness was adjusted in logistic regression models for age (5 year bands), sex, index of multiple deprivation (quintile), ethnic group, geographic region (NHS region), period (calendar week of onset), health and social care worker status (adults), clinical risk group status (a separate flag for those aged over and under 16), clinically extremely vulnerable (if aged 16 and above) ), and severely immunosuppressed (adults). For children age was defined as at 31 August 2021 whereas for adults this was age at 31 March 2021.

**Supplement 2. Total number of positive and negative PCR-confirmed SARS-CoV-2 test results in individuals tested for SARS-CoV-2 for grouped ages 12-15, 16-17, 18-39 and 40-64 in England. Children aged 12-15 years have yet to receive their second dose of vaccine in England**

| Age group           | 12-15          |              |                |              |                |              | 16-17          |              |               |              |               |              |
|---------------------|----------------|--------------|----------------|--------------|----------------|--------------|----------------|--------------|---------------|--------------|---------------|--------------|
|                     | Overall        |              | Positive       |              | Negative       |              | Overall        |              | Positive      |              | Negative      |              |
|                     | n              | %            | n              | %            | n              | %            | n              | %            | n             | %            | n             | %            |
| <b>Test Result</b>  | <b>404,744</b> | <b>100.0</b> | <b>214,920</b> | <b>100.0</b> | <b>189,824</b> | <b>100.0</b> | <b>138,273</b> | <b>100.0</b> | <b>65,059</b> | <b>100.0</b> | <b>73,214</b> | <b>100.0</b> |
| Unvaccinated        | 359,359        | <b>88.8</b>  | 191,026        | <b>88.9</b>  | 168,333        | <b>88.7</b>  | 68,318         | <b>49.4</b>  | 39,168        | <b>60.2</b>  | 29,150        | <b>39.8</b>  |
| Dose 1: day 0-3     | 9,136          | <b>2.3</b>   | 6083           | <b>2.8</b>   | 3053           | <b>1.6</b>   | 2,551          | <b>1.8</b>   | 1638          | <b>2.5</b>   | 913           | <b>1.2</b>   |
| Dose 1: day 4-6     | 7,388          | <b>1.8</b>   | 5,048          | <b>2.3</b>   | 2,340          | <b>1.2</b>   | 2,888          | <b>2.1</b>   | 1,644         | <b>2.5</b>   | 1,244         | <b>1.7</b>   |
| Dose 1: day 7-9     | 6,582          | <b>1.6</b>   | 4,495          | <b>2.1</b>   | 2087           | <b>1.1</b>   | 4,006          | <b>2.9</b>   | 2,034         | <b>3.1</b>   | 1972          | <b>2.7</b>   |
| Dose 1: day 10-13   | 5,580          | <b>1.4</b>   | 2789           | <b>1.3</b>   | 2,791          | <b>1.5</b>   | 4,708          | <b>3.4</b>   | 1582          | <b>2.4</b>   | 3,126         | <b>4.3</b>   |
| Dose 1: 2 weeks     | 5,283          | <b>1.3</b>   | 1571           | <b>0.7</b>   | 3,712          | <b>2.0</b>   | 6,766          | <b>4.9</b>   | 1343          | <b>2.1</b>   | 5,423         | <b>7.4</b>   |
| Dose 1: 3 weeks     | 3,916          | <b>1.0</b>   | 1,195          | <b>0.6</b>   | 2,721          | <b>1.4</b>   | 6,492          | <b>4.7</b>   | 1,187         | <b>1.8</b>   | 5,305         | <b>7.2</b>   |
| Dose 1: 4 weeks     | 3,195          | <b>0.8</b>   | 1,090          | <b>0.5</b>   | 2,105          | <b>1.1</b>   | 6,866          | <b>5.0</b>   | 1,473         | <b>2.3</b>   | 5,393         | <b>7.4</b>   |
| Dose 1: 5 weeks     | 2,264          | <b>0.6</b>   | 826            | <b>0.4</b>   | 1,438          | <b>0.8</b>   | 6,670          | <b>4.8</b>   | 1,770         | <b>2.7</b>   | 4,900         | <b>6.7</b>   |
| Dose 1: 6-7 weeks   | 1,966          | <b>0.5</b>   | 768            | <b>0.4</b>   | 1,198          | <b>0.6</b>   | 11,252         | <b>8.1</b>   | 4,491         | <b>6.9</b>   | 6,761         | <b>9.2</b>   |
| Dose 1: 8-9 weeks   | 75             | <b>0.0</b>   | 29             | <b>0.0</b>   | 46             | <b>0.0</b>   | 8,195          | <b>5.9</b>   | 4,315         | <b>6.6</b>   | 3,880         | <b>5.3</b>   |
| Dose 1: 10-11 weeks | -              | -            | -              | -            | -              | -            | 5,962          | <b>4.3</b>   | 3,089         | <b>4.7</b>   | 2,873         | <b>3.9</b>   |
| Dose 1: 12+ weeks   | -              | -            | -              | -            | -              | -            | 2,073          | <b>1.5</b>   | 1,016         | <b>1.6</b>   | 1,057         | <b>1.4</b>   |
| Dose 2: 0-3 days    | -              | -            | -              | -            | -              | -            | 345            | <b>0.2</b>   | 157           | <b>0.2</b>   | 188           | <b>0.3</b>   |
| Dose 2: 4-6 days    | -              | -            | -              | -            | -              | -            | 196            | <b>0.1</b>   | 65            | <b>0.1</b>   | 131           | <b>0.2</b>   |
| Dose 2: 1 week      | -              | -            | -              | -            | -              | -            | 321            | <b>0.2</b>   | 34            | <b>0.1</b>   | 287           | <b>0.4</b>   |
| Dose 2: 2-9 weeks   | -              | -            | -              | -            | -              | -            | 664            | <b>0.5</b>   | 53            | <b>0.1</b>   | 611           | <b>0.8</b>   |

| Age Group                                               |                     | 18-39            |              |                |              |                |              | 40-64          |              |               |              |                |              |
|---------------------------------------------------------|---------------------|------------------|--------------|----------------|--------------|----------------|--------------|----------------|--------------|---------------|--------------|----------------|--------------|
|                                                         |                     | Overall          |              | Positive       |              | Negative       |              | Overall        |              | Positive      |              | Negative       |              |
| Test Result                                             |                     | n                | %            | n              | %            | n              | %            | n              | %            | n             | %            | n              | %            |
|                                                         |                     | <b>1,502,406</b> | <b>100.0</b> | <b>569,421</b> | <b>100.0</b> | <b>932,985</b> | <b>100.0</b> | <b>234,711</b> | <b>100.0</b> | <b>90,900</b> | <b>100.0</b> | <b>143,811</b> | <b>100.0</b> |
| Vaccination<br>Status and<br>intervals<br>after vaccine | Unvaccinated        | 649,162          | <b>43.2</b>  | 314,215        | <b>55.2</b>  | 334,947        | <b>35.9</b>  | 145,318        | <b>61.9</b>  | 70,752        | <b>77.8</b>  | 74,566         | <b>51.8</b>  |
|                                                         | Dose 1: day 0-3     | 20,995           | <b>1.4</b>   | 10,424         | <b>1.8</b>   | 10,571         | <b>1.1</b>   | 1,128          | <b>0.5</b>   | 454           | <b>0.5</b>   | 674            | <b>0.5</b>   |
|                                                         | Dose 1: day 4-6     | 20,370           | <b>1.4</b>   | 10388          | <b>1.8</b>   | 9,982          | <b>1.1</b>   | 882            | <b>0.4</b>   | 360           | <b>0.4</b>   | 522            | <b>0.4</b>   |
|                                                         | Dose 1: day 7-9     | 23,215           | <b>1.5</b>   | 11,943         | <b>2.1</b>   | 11,272         | <b>1.2</b>   | 995            | <b>0.4</b>   | 430           | <b>0.5</b>   | 565            | <b>0.4</b>   |
|                                                         | Dose 1: day 10-13   | 28,390           | <b>1.9</b>   | 11,780         | <b>2.1</b>   | 16,610         | <b>1.8</b>   | 1,276          | <b>0.5</b>   | 440           | <b>0.5</b>   | 836            | <b>0.6</b>   |
|                                                         | Dose 1: 2 weeks     | 46,081           | <b>3.1</b>   | 14,751         | <b>2.6</b>   | 31,330         | <b>3.4</b>   | 2,171          | <b>0.9</b>   | 615           | <b>0.7</b>   | 1,556          | <b>1.1</b>   |
|                                                         | Dose 1: 3 weeks     | 50,686           | <b>3.4</b>   | 18,038         | <b>3.2</b>   | 32,648         | <b>3.5</b>   | 2,212          | <b>0.9</b>   | 710           | <b>0.8</b>   | 1,502          | <b>1.0</b>   |
|                                                         | Dose 1: 4 weeks     | 54,689           | <b>3.6</b>   | 21,048         | <b>3.7</b>   | 33,641         | <b>3.6</b>   | 2,408          | <b>1.0</b>   | 807           | <b>0.9</b>   | 1,601          | <b>1.1</b>   |
|                                                         | Dose 1: 5 weeks     | 56,842           | <b>3.8</b>   | 23300          | <b>4.1</b>   | 33542          | <b>3.6</b>   | 2,849          | <b>1.2</b>   | 951           | <b>1.0</b>   | 1898           | <b>1.3</b>   |
|                                                         | Dose 1: 6-7 weeks   | 112,281          | <b>7.5</b>   | 48897          | <b>8.6</b>   | 63,384         | <b>6.8</b>   | 8,014          | <b>3.4</b>   | 2492          | <b>2.7</b>   | 5,522          | <b>3.8</b>   |
|                                                         | Dose 1: 8-9 weeks   | 48,574           | <b>3.2</b>   | 21690          | <b>3.8</b>   | 26,884         | <b>2.9</b>   | 6,361          | <b>2.7</b>   | 1884          | <b>2.1</b>   | 4,477          | <b>3.1</b>   |
|                                                         | Dose 1: 10-11 weeks | 18,696           | <b>1.2</b>   | 7,688          | <b>1.4</b>   | 11,008         | <b>1.2</b>   | 3,158          | <b>1.3</b>   | 967           | <b>1.1</b>   | 2,191          | <b>1.5</b>   |
|                                                         | Dose 1: 12+ weeks   | 28,230           | <b>1.9</b>   | 10,448         | <b>1.8</b>   | 17,782         | <b>1.9</b>   | 5,424          | <b>2.3</b>   | 2,166         | <b>2.4</b>   | 3,258          | <b>2.3</b>   |
|                                                         | Dose 2: 0-3 days    | 24,470           | <b>1.6</b>   | 9,840          | <b>1.7</b>   | 14,630         | <b>1.6</b>   | 2,375          | <b>1.0</b>   | 681           | <b>0.7</b>   | 1,694          | <b>1.2</b>   |
|                                                         | Dose 2: 4-6 days    | 16,797           | <b>1.1</b>   | 5169           | <b>0.9</b>   | 11628          | <b>1.2</b>   | 1,724          | <b>0.7</b>   | 421           | <b>0.5</b>   | 1303           | <b>0.9</b>   |
|                                                         | Dose 2: 1 week      | 33,438           | <b>2.2</b>   | 3,204          | <b>0.6</b>   | 30,234         | <b>3.2</b>   | 3,546          | <b>1.5</b>   | 342           | <b>0.4</b>   | 3,204          | <b>2.2</b>   |
|                                                         | Dose 2: 2-9 weeks   | 269,490          | <b>17.9</b>  | 26,598         | <b>4.7</b>   | 242,892        | <b>26.0</b>  | 44,870         | <b>19.1</b>  | 6,428         | <b>7.1</b>   | 38,442         | <b>26.7</b>  |

**Supplement 3. Descriptive characteristics of positive and negative PCR-confirmed SARS-CoV-2 test results among adolescents aged 12-17 years after one and two doses of BNT162b2 (Comirnaty, Pfizer-BioNTech in England. Children aged 12-15 years have yet to receive their second dose of vaccine in England.**

|                                                       |                                 | Overall        |              | Positive       |             | Negative       |             |
|-------------------------------------------------------|---------------------------------|----------------|--------------|----------------|-------------|----------------|-------------|
|                                                       |                                 | n              | %            | n              | %           | n              | %           |
| <b>Test Result</b>                                    |                                 | <b>543,017</b> | <b>100.0</b> | <b>279,979</b> | <b>51.6</b> | <b>263,038</b> | <b>48.4</b> |
| <b>Vaccination Status and intervals after vaccine</b> | Unvaccinated                    | 427,677        | <b>78.8</b>  | 230,194        | <b>42.4</b> | 197,483        | <b>36.4</b> |
|                                                       | Dose 1: day 0-3                 | 11,687         | <b>2.2</b>   | 7,721          | <b>1.4</b>  | 3,966          | <b>0.7</b>  |
|                                                       | Dose 1: day 4-6                 | 10,276         | <b>1.9</b>   | 6,692          | <b>1.2</b>  | 3,584          | <b>0.7</b>  |
|                                                       | Dose 1: day 7-9                 | 10,588         | <b>1.9</b>   | 6,529          | <b>1.2</b>  | 4,059          | <b>0.7</b>  |
|                                                       | Dose 1: day 10-13               | 10,288         | <b>1.9</b>   | 4,371          | <b>0.8</b>  | 5,917          | <b>1.1</b>  |
|                                                       | Dose 1: 2+ weeks                | 70,975         | <b>13.1</b>  | 24,163         | <b>4.4</b>  | 46,812         | <b>8.6</b>  |
|                                                       | Dose 2: day 0-3                 | 345            | <b>0.1</b>   | 157            | <b>0.0</b>  | 188            | <b>0.0</b>  |
|                                                       | Dose 2: day 4-6                 | 196            | <b>0.0</b>   | 65             | <b>0.0</b>  | 131            | <b>0.0</b>  |
|                                                       | Dose 2: day 7-13                | 321            | <b>0.1</b>   | 34             | <b>0.0</b>  | 287            | <b>0.1</b>  |
|                                                       | Dose 2: 2+ weeks                | 664            | <b>0.1</b>   | 53             | <b>0.0</b>  | 611            | <b>0.1</b>  |
| <b>Age (years)</b>                                    | 12                              | 99,273         | <b>18.3</b>  | 52,579         | <b>18.8</b> | 46,694         | <b>17.8</b> |
|                                                       | 13                              | 102,785        | <b>18.9</b>  | 54,433         | <b>19.4</b> | 48,352         | <b>18.4</b> |
|                                                       | 14                              | 101,432        | <b>18.7</b>  | 53,451         | <b>19.1</b> | 47,981         | <b>18.2</b> |
|                                                       | 15                              | 101,254        | <b>18.6</b>  | 54,457         | <b>19.5</b> | 46,797         | <b>17.8</b> |
|                                                       | 16                              | 69,174         | <b>12.7</b>  | 33,562         | <b>12.0</b> | 35,612         | <b>13.5</b> |
|                                                       | 17                              | 69,099         | <b>12.7</b>  | 31,497         | <b>11.2</b> | 37,602         | <b>14.3</b> |
| <b>Gender</b>                                         | Female                          | 274,867        | <b>50.6</b>  | 142,898        | <b>51.0</b> | 131,969        | <b>50.2</b> |
|                                                       | Male                            | 267,357        | <b>49.2</b>  | 136,704        | <b>48.8</b> | 130,653        | <b>49.7</b> |
|                                                       | Missing                         | 793            | <b>0.1</b>   | 377            | <b>0.1</b>  | 416            | <b>0.2</b>  |
| <b>Ethnicity</b>                                      | African                         | 7,298          | <b>1.3</b>   | 3,925          | <b>1.4</b>  | 3,373          | <b>1.3</b>  |
|                                                       | Another Asian background        | 6,765          | <b>1.2</b>   | 3,541          | <b>1.3</b>  | 3,224          | <b>1.2</b>  |
|                                                       | Another Black background        | 890            | <b>0.2</b>   | 461            | <b>0.2</b>  | 429            | <b>0.2</b>  |
|                                                       | Another ethnic background       | 3,024          | <b>0.6</b>   | 1,476          | <b>0.5</b>  | 1,548          | <b>0.6</b>  |
|                                                       | Arab                            | 2,218          | <b>0.4</b>   | 1,140          | <b>0.4</b>  | 1,078          | <b>0.4</b>  |
|                                                       | Bangladeshi                     | 4,497          | <b>0.8</b>   | 2,203          | <b>0.8</b>  | 2,294          | <b>0.9</b>  |
|                                                       | Caribbean                       | 2,307          | <b>0.4</b>   | 1,173          | <b>0.4</b>  | 1,134          | <b>0.4</b>  |
|                                                       | Chinese                         | 2,867          | <b>0.5</b>   | 1,474          | <b>0.5</b>  | 1,393          | <b>0.5</b>  |
|                                                       | Indian                          | 14,655         | <b>2.7</b>   | 7,280          | <b>2.6</b>  | 7,375          | <b>2.8</b>  |
|                                                       | Mixed or multiple ethnic groups | 23,853         | <b>4.4</b>   | 11,945         | <b>4.3</b>  | 11,908         | <b>4.5</b>  |
|                                                       | Pakistani                       | 13,371         | <b>2.5</b>   | 5,998          | <b>2.1</b>  | 7,373          | <b>2.8</b>  |
|                                                       | Prefer not to say               | 15,219         | <b>2.8</b>   | 7,440          | <b>2.7</b>  | 7,779          | <b>3.0</b>  |
| White                                                 | 446,053                         | <b>82.1</b>    | 231,923      | <b>82.8</b>    | 214,130     | <b>81.4</b>    |             |

|                                |                 | Overall |             | Positive |             | Negative |             |
|--------------------------------|-----------------|---------|-------------|----------|-------------|----------|-------------|
|                                |                 | n       | %           | n        | %           | n        | %           |
| <b>NHS Region</b>              | East of England | 70,215  | <b>12.9</b> | 36,168   | <b>12.9</b> | 34,047   | <b>12.9</b> |
|                                | London          | 47,297  | <b>8.7</b>  | 22,961   | <b>8.2</b>  | 24,336   | <b>9.3</b>  |
|                                | Midlands        | 110,649 | <b>20.4</b> | 57,529   | <b>20.5</b> | 53,120   | <b>20.2</b> |
|                                | North East      | 84,866  | <b>15.6</b> | 44,581   | <b>15.9</b> | 40,285   | <b>15.3</b> |
|                                | North West      | 67,914  | <b>12.5</b> | 33,209   | <b>11.9</b> | 34,705   | <b>13.2</b> |
|                                | South East      | 94,900  | <b>17.5</b> | 50,323   | <b>18.0</b> | 44,577   | <b>16.9</b> |
|                                | South West      | 67,174  | <b>12.4</b> | 35,206   | <b>12.6</b> | 31,968   | <b>12.2</b> |
|                                | Missing         | 2       | <b>0.0</b>  | 2        | <b>0.0</b>  | -        | -           |
| <b>IMD Quintiles</b>           | 1               | 94,736  | <b>17.4</b> | 46,073   | <b>16.5</b> | 48,663   | <b>18.5</b> |
|                                | 2               | 93,331  | <b>17.2</b> | 47,434   | <b>16.9</b> | 45,897   | <b>17.4</b> |
|                                | 3               | 105,171 | <b>19.4</b> | 55,082   | <b>19.7</b> | 50,089   | <b>19.0</b> |
|                                | 4               | 115,589 | <b>21.3</b> | 60,907   | <b>21.8</b> | 54,682   | <b>20.8</b> |
|                                | 5               | 133,494 | <b>24.6</b> | 70,122   | <b>25.0</b> | 63,372   | <b>24.1</b> |
|                                | Missing         | 696     | <b>0.1</b>  | 361      | <b>0.1</b>  | 335      | <b>0.1</b>  |
| <b>Vaccine priority groups</b> | At risk         | 100,915 | <b>18.6</b> | 46,780   | <b>16.7</b> | 54,135   | <b>20.6</b> |
|                                | CEV             | 265     | <b>0.05</b> | 112      | <b>0.04</b> | 153      | <b>0.05</b> |

**Supplement 4. Weekly incidence of COVID-19 cases per 100,000 population from week 23 2021, in secondary age cohorts (Year 7 to 11) and sixth form age cohorts (Year 12 to Year 13) with dose 1 vaccine uptake in 12-15-year-olds and in 16-17-year-olds.**

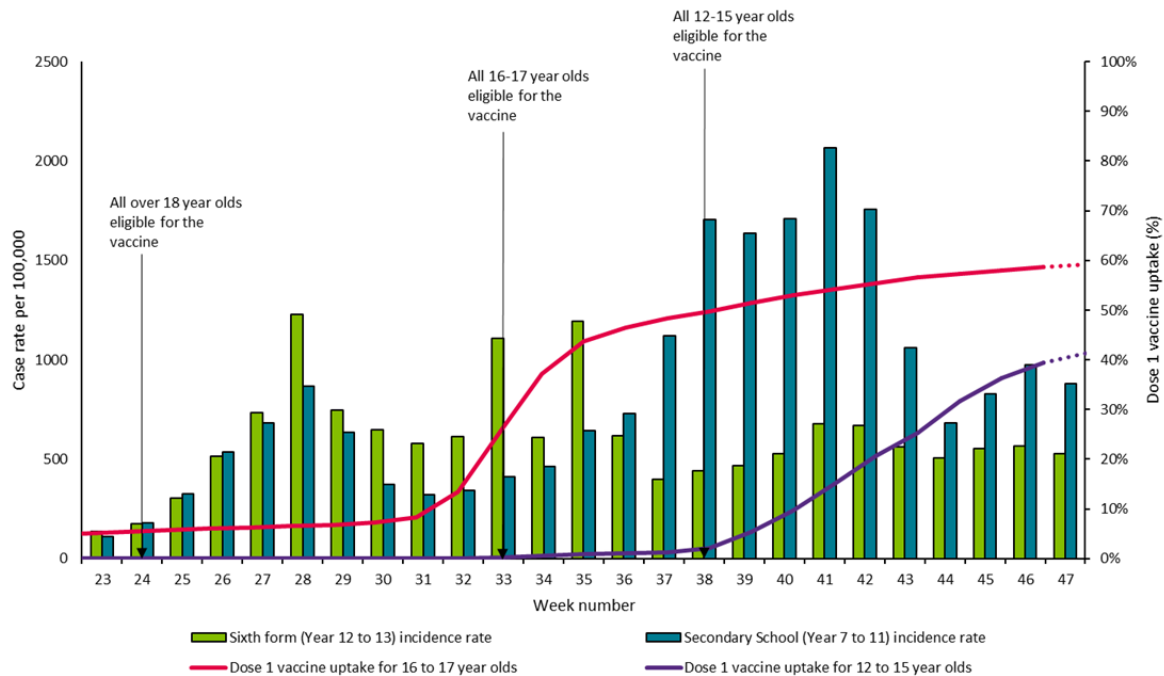

Graph taken from UKHSA Weekly Influenza and COVID-19 Surveillance graphs <sup>3</sup>

Incidence definition: School age cohorts are calculated based on academic year birth cohorts. Those born between 01/09/2004 – 31/08/2005 are included in the year 12 school group and those born between 01/09/2003 – 31/08/2004 are included in the year 13 school group. Case rate denominators are sourced from ONS 2020 mid-year estimates.

Vaccine coverage definition: From Week 42 the ages are calculated based on age as of 31 August 2021. The under 50 age group includes all those aged under 50 including those born after the 31 August 2021 (denominator). Those whose date of birth is after the 31 August 2021, have an age of zero and are included in the denominator. Only vaccinations recorded as given to persons aged greater or equal to 1 have been included (numerator). Both numerators and denominators are sourced from the NIMS and exclude deaths. All data presented are for vaccinations within the living population on the date of extraction and therefore removes both formal and informal registered deaths in the numerator and denominator for the purposes of calculating vaccine uptake.

**Supplement 5. Vaccine effectiveness with 95% confidence intervals against symptomatic, PCR-confirmed COVID-19 among adolescents and adults after one and two doses of BNT162b2 (Comirnaty, Pfizer-BioNTech) in England. Children aged 12-15 years have yet to receive their second dose of vaccine in England**

| Age group              | 12-15                  | 16-17                 | 18-39                | 40-64                |
|------------------------|------------------------|-----------------------|----------------------|----------------------|
| Interval after vaccine | VE                     | VE                    | VE                   | VE                   |
| Dose 1: day 0-3        | -27.8 (-33.7 to -22.2) | -16.2 (-26.7 to -6.7) | -9.9 (-13.2 to -6.7) | 11.9 (-0.7 to 23)    |
| Dose 1: day 4-6        | -30.4 (-37.2 to -23.9) | 3.9 (-3.9 to 11.2)    | -4.5 (-7.7 to -1.4)  | 10.9 (-3.5 to 23.3)  |
| Dose 1: day 7-9        | -26.4 (-33.3 to -19.7) | 23.1 (17.7 to 28.1)   | -0.7 (-3.5 to 2.1)   | -1.9 (-17.4 to 11.5) |
| Dose 1: day 10-13      | 41.4 (38.1 to 44.5)    | 58.8 (56 to 61.4)     | 38 (36.4 to 39.5)    | 37.9 (29.6 to 45.2)  |
| Dose 1: 2 weeks        | 75.4 (73.9 to 76.9)    | 75.9 (74.3 to 77.4)   | 63 (62.2 to 63.8)    | 54.5 (49.7 to 58.8)  |
| Dose 1: 3 weeks        | 73.1 (71.2 to 75)      | 70.1 (68 to 72.1)     | 60 (59.2 to 60.8)    | 50.8 (45.9 to 55.3)  |
| Dose 1: 4 weeks        | 65.7 (63 to 68.2)      | 60.8 (58.2 to 63.2)   | 56.8 (56 to 57.6)    | 47.5 (42.5 to 52)    |
| Dose 1: 5 weeks        | 58.3 (54.5 to 61.9)    | 54.9 (52 to 57.5)     | 54.2 (53.4 to 55.1)  | 48.9 (44.5 to 52.9)  |
| Dose 1: 6-7 weeks      | 52.1 (47.4 to 56.4)    | 42.6 (39.8 to 45.2)   | 52.4 (51.7 to 53)    | 45.3 (42.3 to 48.2)  |
| Dose 1: 8-9 weeks      | 46.8 (14.9 to 66.7)    | 34.3 (30.7 to 37.7)   | 46.5 (45.4 to 47.5)  | 38.4 (34.3 to 42.2)  |
| Dose 1: 10-11 weeks    | -                      | 34.3 (30 to 38.3)     | 41.4 (39.6 to 43.2)  | 36 (30 to 41.5)      |
| Dose 1: 12+ weeks      | -                      | 37.4 (30.8 to 43.3)   | 39.5 (37.9 to 41)    | 53 (50.2 to 55.6)    |
| Dose 2: 0-3 days       | -                      | 45.1 (31.9 to 55.8)   | 54.3 (53 to 55.5)    | 50.3 (45.2 to 55.1)  |
| Dose 2: 4-6 days       | -                      | 68.9 (57.9 to 77)     | 68.8 (67.7 to 69.9)  | 62.8 (58 to 67)      |
| Dose 2: 1 week         | -                      | 92.9 (89.9 to 95.1)   | 92.2 (91.9 to 92.5)  | 87.1 (85.5 to 88.5)  |
| Dose 2: 2-9 weeks      | -                      | 94.6 (92.8 to 95.9)   | 88.7 (88.5 to 88.8)  | 84.1 (83.6 to 84.5)  |

**Supplement 6. Vaccine effectiveness and 95% confidence intervals against hospitalisation following PCR-confirmed COVID-19 among adolescents aged 16-17 with one dose of Comirnaty (PF) in England**

|                                              | Test Result  | Overall       |              | Positive  |              | Negative      |              | VE                     |
|----------------------------------------------|--------------|---------------|--------------|-----------|--------------|---------------|--------------|------------------------|
|                                              |              | n             | %            | n         | %            | n             | %            |                        |
|                                              |              | <b>65,187</b> | <b>100.0</b> | <b>88</b> | <b>100.0</b> | <b>64,999</b> | <b>100.0</b> |                        |
| Vaccination status and interval after dose 1 | Unvaccinated | 26,976        | 41.4         | 70        | 79.5         | 26,826        | 41.3         | -                      |
|                                              | day 0-3      | 897           | 1.4          | 2         | 2.3          | 893           | 1.4          | 34.7 (-170.8 to 84.3)  |
|                                              | day 4-6      | 1,223         | 1.9          | 3         | 3.4          | 1,217         | 1.9          | 0.3 (-225.2 to 69.4)   |
|                                              | day 7-9      | 1,956         | 3.0          | 5         | 5.7          | 1,945         | 3.0          | -16.3 (-202.2 to 55.2) |
|                                              | day 10-13    | 3,083         | 4.7          | 1         | 1.1          | 3,081         | 4.7          | 82.2 (-31.8 to 97.6)   |
|                                              | 2 weeks +    | 31,052        | 47.6         | 7         | 8.0          | 31,037        | 47.7         | 84.5 (64.6 to 93.2)    |



## References

1. Lopez Bernal J, Andrews N, Gower C, et al. Effectiveness of the Pfizer-BioNTech and Oxford-AstraZeneca vaccines on covid-19 related symptoms, hospital admissions, and mortality in older adults in England: test negative case-control study. *BMJ* 2021; **373**: n1088.
2. Andrews N, Stowe J, Kirsebom F, Gower C, Ramsay M, Bernal JL. Effectiveness of BNT162b2 (Comirnaty, Pfizer-BioNTech) COVID-19 booster vaccine against covid-19 related symptoms in England: test negative case-control study. *medRxiv* 2021: 2021.11.15.21266341.
3. UKHSA. Weekly Influenza and COVID-19 Surveillance graphs. 2021. [https://assets.publishing.service.gov.uk/government/uploads/system/uploads/attachment\\_data/file/1035958/Weekly\\_COVID-19\\_and\\_Influenza\\_Surveillance\\_Graphs\\_w47.pdf](https://assets.publishing.service.gov.uk/government/uploads/system/uploads/attachment_data/file/1035958/Weekly_COVID-19_and_Influenza_Surveillance_Graphs_w47.pdf) (accessed 12th December 2021).
